# Supplementary material for: Automatic cassava disease recognition using object segmentation and progressive learning
Source: PeerJ journal article supplement (doi:10.7717/peerj-cs.2721), 2025-03-18
Supplement: Graphical_Abstract.pdf [file Graphical_Abstract.pdf]

## On-field Cassava Leaves

Cassava is an important staple crop grown in tropical and subtropical areas of the world. However, viral diseases can significantly impact yields and food security for smallholder farmers that rely on cassava. Timely and accurate disease detection in the field is critical but poses

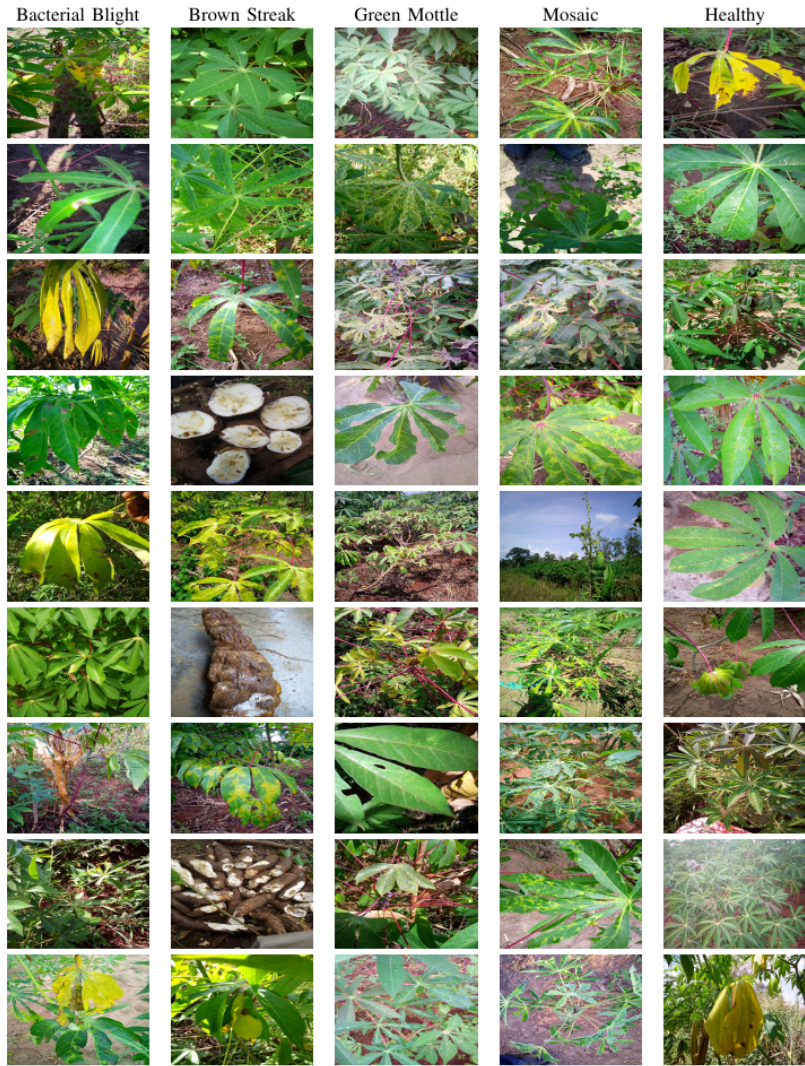

## Object Segmentation Model

Detecting diseases from on-field images presents several key challenges: Complex backgrounds with soil, stakes, foliage obstructing leaves; Inconsistent lighting and shadows; Leaf deformation and occlusion

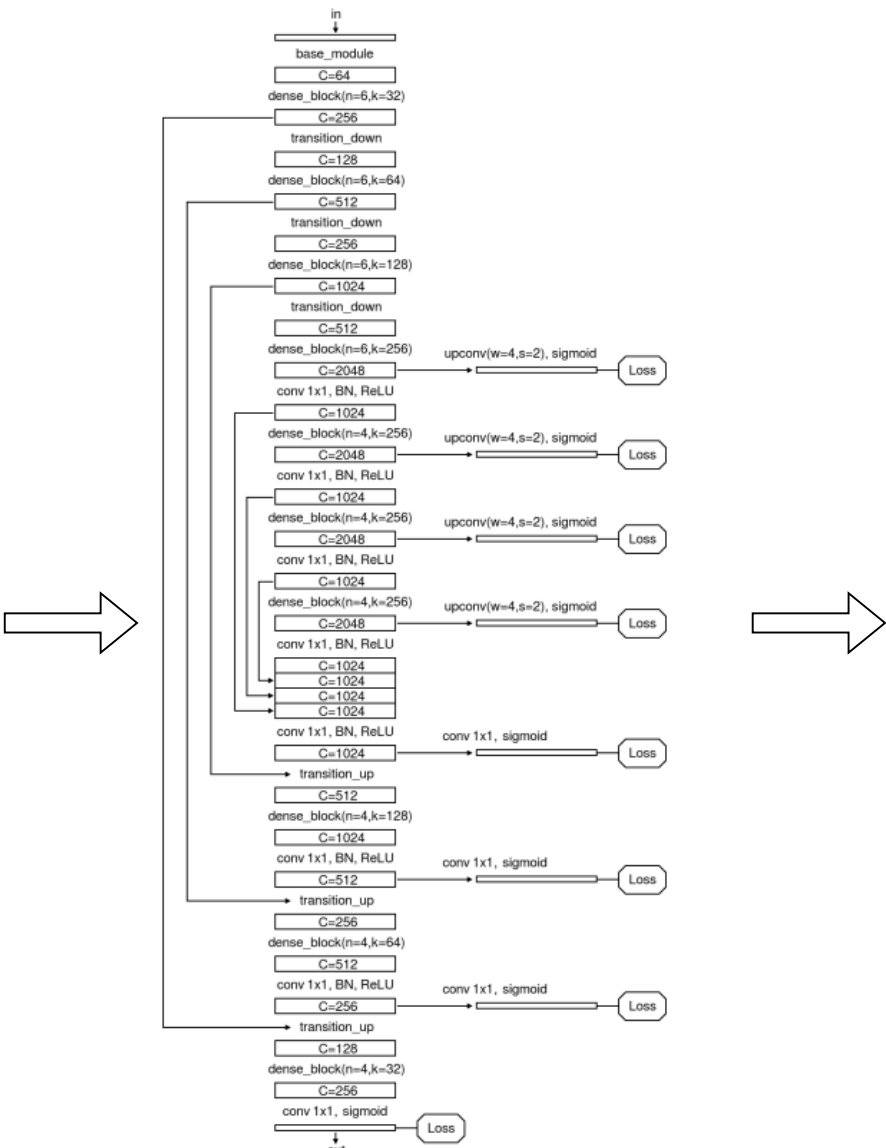

## Extracted Cassava Leaves

Before cassava disease recognition step, it is of vital importance to carry out localization of the cassava leaf object from the cluttered background.

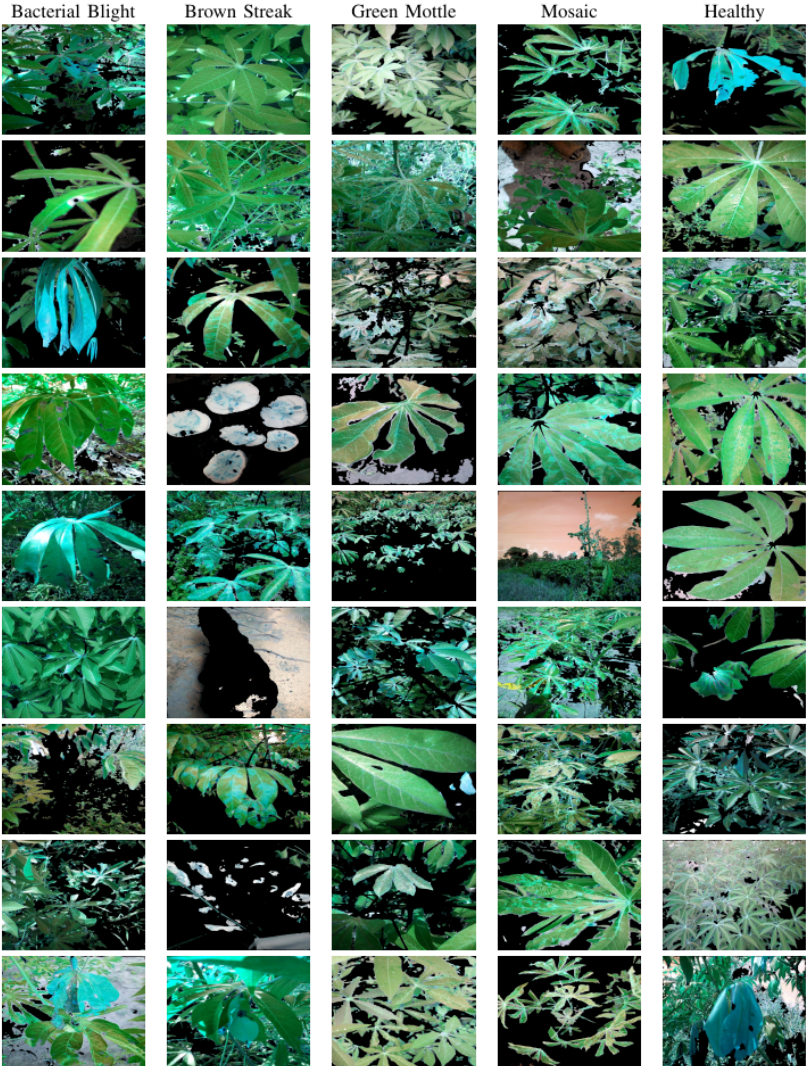

## Cassava Disease Recognition

An ensemble network utilizing efficient deep learning networks is proposed to reduce computational costs while enhancing overall performance in image recognition tasks. The proposed AI-based cassava disease recognition system outperforms traditional microscopic methods significantly in efficiency, with more than 90% accuracy in less than 5 seconds using a Nvidia GTX1080 graphic card for model inference.

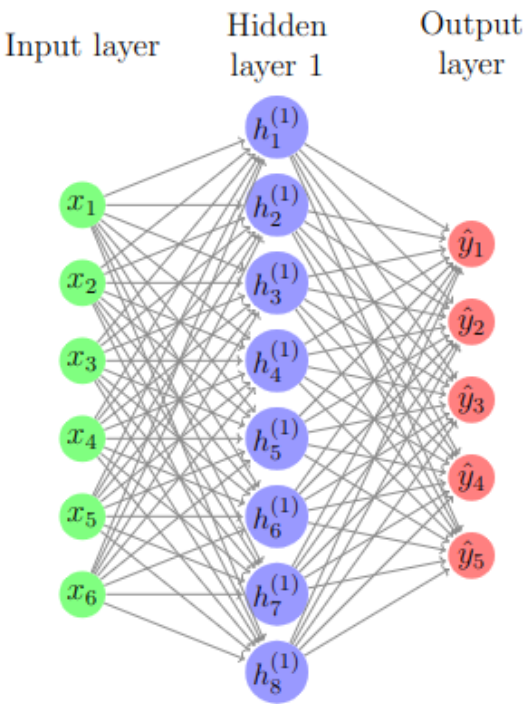

| Solution          | Public Leaderboard | Private Leaderboard |
|-------------------|--------------------|---------------------|
| 1st place         | 91.36%             | 91.32%              |
| 2nd place         | 90.25%             | 90.43%              |
| 3rd place         | 90.59%             | 90.28%              |
| submission (19th) | 90.52%             | 90.11%              |
| late submission   | <b>91.38%</b>      | <b>91.43%</b>       |
